# Supplementary material
Source: HighWire-hosted journal article supplement (https://www.cmajopen.ca/highwire/filestream/89363/field_highwire_adjunct_files/0/open-2021-0170-1-at.pdf)
Supplement: open-2021-0170-1-at.pdf [file open-2021-0170-1-at.pdf]

**Supplementary Table 1. Grid search parameters for XGBoost models**

| Parameter                      | Values    |
|--------------------------------|-----------|
| Cross-validation folds         | 5         |
| lambda (L2 regularization)     | 0, 0.5, 1 |
| Alpha (L1 regularization)      | 0, 0.5, 1 |
| Max depth                      | 5, 8      |
| Min child weight               | 4, 8      |
| N_estimators (number of trees) | 500, 1000 |
| Subsample                      | 0.8       |
